# Supplementary material for: Invaders, natives and their enemies: distribution patterns of amphipods and their microsporidian parasites in the Ruhr Metropolis, Germany
Source: PubMed Central journal article supplement (PMC4534018; doi:10.1186/s13071-015-1036-6), 2015-08-13
Supplement: 13071_2015_1036_MOESM1_ESM.pdf [file 13071_2015_1036_MOESM1_ESM.pdf]

**Additional file 1. Sampling locations**

| <b>Site number</b> | <b>Site name</b>                               | <b>Coordinates (lat.; long.)</b> |
|--------------------|------------------------------------------------|----------------------------------|
| 1                  | Quälingsbach                                   | 51.5856151; 6.9540089            |
| 2                  | Brabecker Mühlenbach                           | 51.5934367; 6.9537975            |
| 3                  | Boye                                           | 51.5690727; 6.9287250            |
| 4                  | Schöttelbach                                   | 51.5639119; 6.9117179            |
| 5                  | Bornemannsbach                                 | 51.5983583; 6.9386889            |
| 6                  | Kirchschemmsbach                               | 51.5437030; 6.9405765            |
| 7                  | Vorthbach 42                                   | 51.5358507; 6.9139819            |
| 8                  | Vorthbach 43                                   | 51.5435291; 6.9205793            |
| 9                  | Ruhr upstream Kemnader Lake                    | 51.4208960; 7.2966850            |
| 10                 | Rapphoffs Mühlenbach close to mouth into Lippe | 51.6643410; 6.9762790            |
| 11                 | Emscher near Lake Phönix                       | 51.4867500; 7.5230420            |
| 12                 | Deininghauser Brook                            | 51.5812470; 7.3192820            |
| 13                 | Kemnader Lake                                  | 51.4229100; 7.2679480            |
| 14                 | Mühlengraben, branch of Kemnader Lake          | 51.4271230; 7.2859530            |
| 15                 | Lippe near Werne                               | 51.6692020; 7.6992860            |
| 16                 | Lippe near Haltern                             | 51.7328950; 7.1774890            |
| 17                 | Emscher close to mouth into Rhine              | 51.5566070; 6.7213380            |
