# Supplementary material for: Invaders, natives and their enemies: distribution patterns of amphipods and their microsporidian parasites in the Ruhr Metropolis, Germany
Source: PubMed Central journal article supplement (PMC4534018; doi:10.1186/s13071-015-1036-6), 2015-08-13
Supplement: 13071_2015_1036_MOESM2_ESM.pdf [file 13071_2015_1036_MOESM2_ESM.pdf]

**Additional file 2.** Genetic data of host amphipod species. Given are the number of specimens (N), number of haplotypes (H), haplotype diversity (Hd) and genetic diversity ( $\pi$ ); sd = standard deviation.

| <b>Indigenous host species</b>     | N   | H  | Hd    | sd    | $\pi$  | sd     |
|------------------------------------|-----|----|-------|-------|--------|--------|
| <i>G. pulex</i> clade C            | 117 | 22 | 0.868 | 0.019 | 0.0035 | 0.0002 |
| <i>G. pulex</i> clade D            | 3   | 3  | 1.000 | 0.272 | 0.0020 | 0.0007 |
| <i>G. pulex</i> clade E            | 33  | 6  | 0.333 | 0.105 | 0.0006 | 0.0002 |
| <i>G. fossarum</i> type B          | 23  | 3  | 0.170 | 0.102 | 0.0003 | 0.0002 |
| <i>G. roeselii</i>                 | 30  | 5  | 0.361 | 0.109 | 0.0011 | 0.0004 |
|                                    |     |    |       |       |        |        |
| <b>Non-indigenous host species</b> |     |    |       |       |        |        |
| <i>D. villosus</i>                 | 42  | 3  | 0.138 | 0.071 | 0.0003 | 0.0001 |
| <i>D. haemobaphes</i>              | 21  | 2  | 0.524 | 0.036 | 0.0008 | 0.0001 |
| <i>G. tigrinus</i>                 | 30  | 6  | 0.545 | 0.101 | 0.0085 | 0.0027 |
| <i>E. berilloni</i>                | 15  | 3  | 0.257 | 0.020 | 0.0006 | 0.0004 |
| <i>E. trichiatus</i>               | 5   | 1  | 0.000 | 0.000 | 0.0000 | 0.0000 |
